# Supplementary material
Source: PubMed Central journal article supplement (PMC7060503)
Supplement: jamainternmed-180-861-s001.pdf [file jamainternmed-180-861-s001.pdf]

## Supplementary Online Content

Heinzerling A, Armatas C, Karmarkar E, et al. Severe lung injury associated with use of e-cigarette, or vaping, products—California, 2019. Published online March 6, 2020. *JAMA Intern Med*. doi:10.1001/jamainternmed.2020.0664

**eFigure 1.** California Department of Public Health case definition for e-cigarette, or vaping, product use-associated lung injury (EVALI)

**eMethods.** Detailed laboratory methods for analysis of case-patient vaping materials

**eTable 1.** Number of patients with product types identified by laboratory testing

**eTable 2.** Patient product types and diluents identified by laboratory testing

This supplementary material has been provided by the authors to give readers additional information about their work.

**eFigure 1:** California Department of Public Health case definition for e-cigarette, or vaping, product use-associated lung injury (EVALI)

|                  |                                                                                                                                                                                                                                                                                                                                                                                                                                                                                                                                                                                                                                                                                                                                                                                                                                                                                                                                                                             |
|------------------|-----------------------------------------------------------------------------------------------------------------------------------------------------------------------------------------------------------------------------------------------------------------------------------------------------------------------------------------------------------------------------------------------------------------------------------------------------------------------------------------------------------------------------------------------------------------------------------------------------------------------------------------------------------------------------------------------------------------------------------------------------------------------------------------------------------------------------------------------------------------------------------------------------------------------------------------------------------------------------|
| <b>Confirmed</b> | Respiratory illness requiring hospitalization.<br><b>AND</b><br>Using an e-cigarette (“vaping”) or dabbing* in 90 days prior to symptom onset.<br><b>AND</b><br>Pulmonary infiltrate, such as opacities on plain film chest radiograph or ground-glass opacities on chest CT.<br><b>AND</b><br>Absence of pulmonary infection on initial work-up: <u>Minimum criteria</u> include negative respiratory viral panel AND influenza PCR or rapid test, if local epidemiology supports testing AND all other clinically indicated respiratory infectious disease testing (e.g., urine antigen for <i>Streptococcus pneumoniae</i> and <i>Legionella</i> , sputum culture if productive cough, bronchoalveolar lavage culture if done, blood culture, HIV-related opportunistic respiratory infections if appropriate) must be negative.<br><b>AND</b><br>No evidence in medical record of alternative plausible diagnoses (e.g., cardiac, rheumatologic or neoplastic process). |
| <b>Probable</b>  | Respiratory illness requiring hospitalization.<br><b>AND</b><br>Using an e-cigarette (“vaping”) or dabbing* in 90 days prior to symptom onset.<br><b>AND</b><br>Pulmonary infiltrate, such as opacities on plain film chest radiograph or ground-glass opacities on chest CT.<br><b>AND</b><br>Infection identified via culture or PCR, but clinical team** believes this is not the sole cause of the underlying respiratory disease process – <b>OR--</b> No evidence of pulmonary infection, but <u>minimum criteria</u> to rule out pulmonary infection not met (testing not performed).<br><b>AND</b><br>No evidence in medical record of alternative plausible diagnoses (e.g., cardiac, rheumatologic or neoplastic process).                                                                                                                                                                                                                                        |
| <b>Footnotes</b> | * Includes using an electronic device (e.g., electronic nicotine delivery system (ENDS), electronic cigarette, e-cigarette, vaporizer, vape(s), vape pen, dab pen, or other) or dabbing to inhale substances (e.g., nicotine, marijuana, THC, THC concentrates, CBD, synthetic cannabinoids, flavorings, or other substances).<br>** Clinical team caring for the patient.                                                                                                                                                                                                                                                                                                                                                                                                                                                                                                                                                                                                  |

**eMethods:** Detailed laboratory methods for analysis of case-patient vaping materials

*Gas chromatography-mass spectrometry (GC-MS) performed by CDPH Laboratory*

Samples were diluted and ran on Agilent 7890B/5977B GC-MS system in full scan mode to measure THC, CBD and other cannabinoids, nicotine, propylene glycol, vitamin E and vitamin E acetate, and other non-targeted compounds. Working standard mixtures containing known toxins were run with the samples to ensure proper performance of the instrument as specified by CDPH's unknown toxin screen method. In addition, a set of vitamin E acetate and vitamin E standard mixtures were run with samples for quantifications. Compound identifications were based on a comparison of electron impact mass spectrum with the Wiley/NIST 2017 Mass Spectral Database compiled by the National Institute of Standards and Technology. All reported compounds possessed a 95% or greater match to the database.

*Liquid chromatography-mass spectrometry (LC-MS) and GC-MS performed by Partner State Public Health Laboratory*

A subset of 27 samples were received as 3- $\mu$ L aliquots and diluted to 300  $\mu$ L with acetonitrile. Quantitative analyses were performed for vitamin E acetate, 10 cannabinoids and nicotine, and untargeted compounds using LC-high-resolution-MS/MS with triple-Time of Flight (TOF) and orbitrap detectors, as well as GC-MS. Database queries were also performed for synthetic cannabinoids, opioids (natural and synthetic), and other controlled substances and pesticides.

*Total Reflection X-ray fluorescence (TXRF) performed by CDPH Laboratory*

A Bruker S2 Picofox TXRF was used to analyze 7  $\mu$ L sample aliquots on acrylic discs. Acquisition times of 5-10 minutes were used for all samples.

**eTable 1.** Number of patients with product types identified by laboratory testing.

| <b>Product types</b>                                 | <b>Number of Patients</b> |
|------------------------------------------------------|---------------------------|
| Tetrahydrocannabinol (THC) products only             | 16 (67%)                  |
| THC products + nicotine products                     | 4 (17%)                   |
| Nicotine products only                               | 4 (17%)                   |
|                                                      |                           |
| <b>Total number of patients with tested products</b> | <b>24</b>                 |

**eTable 2.** Patient product types and diluents identified by laboratory testing.

*Findings represent products obtained from 24/160 (15%) of case patients.*

| <b>Vaping product active ingredient</b> | <b># of Products</b> | <b>Diluent*</b> | <b># of Products</b> |
|-----------------------------------------|----------------------|-----------------|----------------------|
| Tetrahydrocannabinol (THC)              | 49 (56%)             |                 |                      |
|                                         |                      | VEA + VE        | 32 (65%)             |
|                                         |                      | VEA only        | 2 (4%)               |
|                                         |                      | VE only         | 7 (14%)              |
|                                         |                      | None            | 8 (16%)              |
| Nicotine                                | 38 (44%)             |                 |                      |
|                                         |                      | PG              | 34 (89%)             |
|                                         |                      | None            | 4 (11%)              |
| All tested products                     | 87                   |                 |                      |

\*Diluent types: vitamin E acetate (VEA), vitamin E (VE), propylene glycol (PG)
